# TAKING ISSUE

## Improving Symptoms and Ability to Work

Depression is a private nightmare and a pervasive public health problem. Working-age adults with depression experience higher than average rates of job loss, job turnover, premature retirement, work absences, and impaired work performance. The costs to depressed adults and their families, their employers, and the nation reach into the billions of dollars annually. As two reports in this issue make clear, there is an urgent need for research to find solutions to the employment problems of our returning veterans who suffer from mental disorders, including major depression. Current economic conditions may only worsen the employment picture for this already vulnerable group.

Prior depression treatment trials have contributed to the evidence base on high-quality depression treatment, documenting its impact on symptom relief and subsequent reduction in work productivity loss. These important studies help make the “business case” for high-quality treatment and respond to the private sector’s increasing interest in making value-based health care purchasing decisions. However, even if high-quality medical care were available to all working-age adults with depression, evidence from research in the mental health, disability and rehabilitation, and occupational medicine fields indicates that employment problems will persist.

It is time to ask, what would research look like if we really cared whether depressed workers participate fully in the labor market and function effectively on the job? Research is needed to test new care models that better enable adults with depression to be productive and engaged in work. We have an opportunity to think about interventions at the level of the individual, the health care delivery system, and the workplace, including organizational changes. Recent research suggests that workers with depression benefit from coordination of medical care with workplace support services and provision of vocational interventions. Research based on the chronic care model and related approaches suggests the potential value of multidisciplinary teams, which in this instance could ensure that general medical and psychiatric personnel collaborate with professionals close to the work situation, such as counselors in employee assistance programs.

Programs spanning disciplines, professions, and systems pose unique challenges both logistically and financially that will need to be addressed. In addition, we will need more employers to partner in research to ensure that adults with depression, including returning veterans, will be able to participate fully in the workforce.—DEBRA LERNER, M.S., PH.D., and DAVID A. ADLER, M.D., *Tufts Medical Center Institute for Clinical Research and Health Policy Studies and the Departments of Medicine and Psychiatry, Tufts University School of Medicine*

*Psychiatric Services*, established in 1950, is published monthly by the American Psychiatric Association for mental health professionals and others concerned with treatment and services for persons with mental illnesses and mental disabilities, in keeping with APA’s objectives to improve care and treatment, to promote research and professional education in psychiatric and related fields, and to advance the standards of all psychiatric services and facilities.

### Editor

Howard H. Goldman, M.D., Ph.D.

### Editorial Board

David A. Adler, M.D.

Benjamin G. Druss, M.D., M.P.H.

Javier I. Escobar, M.D.

Stephen M. Goldfinger, M.D.

Richard K. Harding, M.D.

Grayson S. Norquist, M.D., M.S.P.H.

Martha Sajatovic, M.D.

Bradley D. Stein, M.D., Ph.D.

Marvin S. Swartz, M.D.

Marcia Valenstein, M.D.

Roy C. Wilson, M.D.

Bonnie T. Zima, M.D., M.P.H.

### Editor Emeritus

John A. Talbott, M.D.

### Book Review Editor

Jeffrey L. Geller, M.D., M.P.H.

### Statistical Consultant

Deborah R. Medoff, Ph.D.

### Contributing Editors

Paul S. Appelbaum, M.D., *Law & Psychiatry*

José Miguel Caldas de Almeida, M.D., and Marcela Horvitz-Lennon, M.D., M.P.H., *Mental Health Care Reforms in Latin America*

Francine Cournois, M.D., and Stephen M. Goldfinger, M.D., *Frontline Reports*

Lisa B. Dixon, M.D., M.P.H., and Brian Hepburn, M.D., *Public-Academic Partnerships*

Jeffrey L. Geller, M.D., M.P.H., *Personal Accounts*

William M. Glazer, M.D., *Best Practices*

Amy M. Kilbourne, Ph.D., M.P.H., and

Tami L. Mark, Ph.D., *Datapoints*

Matt Muijen, M.D., Ph.D., *Mental Health Care Reforms in Europe*

Fred C. Osher, M.D., *State Mental Health Policy*

Jules M. Ranz, M.D., and Susan M. Deakins, M.D., *Case Studies in Public-Sector Leadership*

Steven S. Sharfstein, M.D., Haiden A.

Huskamp, Ph.D., and Alison Evans

Cuellar, Ph.D., *Economic Grand Rounds*

### Editorial Consultants

Norman Clemens, M.D.

Julie M. Donohue, Ph.D.

Robert E. Drake, M.D., Ph.D.

Marcia Kraft Goin, M.D., Ph.D.

Shelly F. Greenfield, M.D., M.P.H.

M. Susan Ridgely, J.D.

Laura Van Tosh

### Editorial Staff

Constance Grant Gartner, *Managing Editor*

Christine Hamel, *Associate Editor*

Demarie S. Jackson, *Associate Editor*

Wendy Lieberman Taylor, *Production Manager*

Samantha Luck, *Editorial Support Services Manager*

### American Psychiatric Association

Carol A. Bernstein, M.D., *President*

John M. Oldham, M.D., *President-Elect*

Jeffrey L. Geller, M.D., M.P.H.,

*Vice-President*

Roger Peele, M.D., *Secretary*

David Fassler, M.D., *Treasurer*

Bruce A. Hershfield, M.D., *Speaker, APA Assembly*

James H. Scully, M.D., *Medical Director and CEO*
