January 2011

# PSYCHIATRIC SERVICES

A Journal of the  
American Psychiatric  
Association

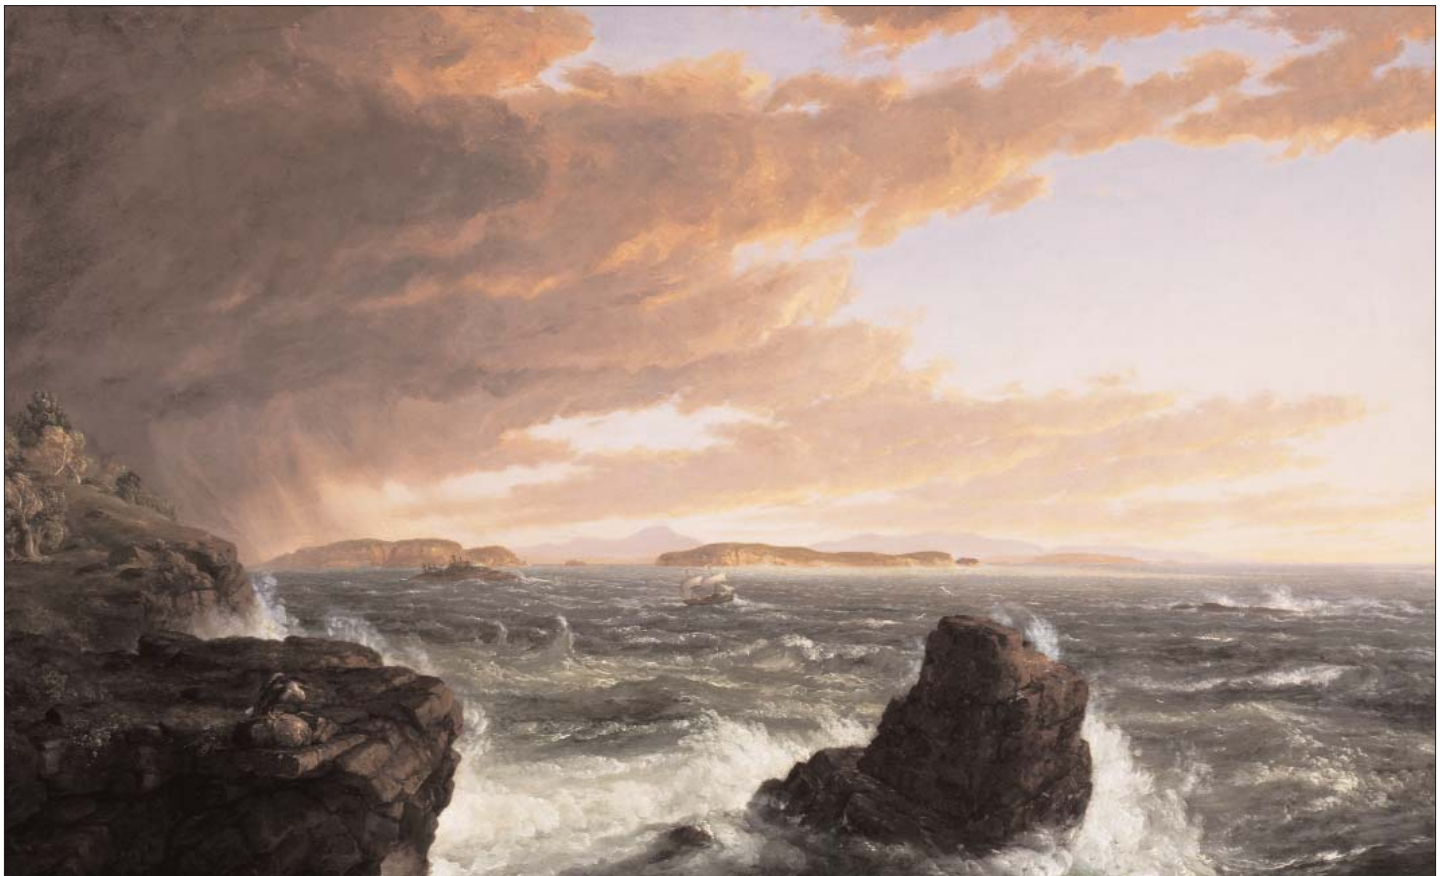

◆ OEF-OIF Veterans and  
Active-Duty Personnel:  
Five New Investigations

◆ Law and Psychiatry:  
New Approaches to  
Malpractice Reform

◆ Helping Clinicians Improve  
Violence Risk Assessment:  
A Learning Evaluation Tool
